# Supplementary material for: Differential immune imprinting by influenza virus vaccination and infection in nonhuman primates
Source: PubMed Central journal article supplement — Proc Natl Acad Sci U S A. 2021 May 31;118(23):e2026752118. doi: 10.1073/pnas.2026752118 (PMC8201799; doi:10.1073/pnas.2026752118), 2021-05-31
Supplement: pnas.2026752118.sapp.pdf [file pnas.2026752118.sapp.pdf]

**Supporting Information for:**

**Differential immune imprinting by influenza virus vaccination and infection in non-human primates**

Kevin R. McCarthy, Tarra A. Von Holle, Laura L. Sutherland, Thomas H. Oguin III, Gregory D. Sempowski, Stephen C. Harrison, M. Anthony Moody

Table S1 Macaque information

| Macaque | Sex    | Age   |
|---------|--------|-------|
| 6145    | Male   | Adult |
| T651    | Female | Adult |
| T771    | Male   | Adult |
| 7071    | Female | Adult |
| 7072    | Female | Adult |
| 7073    | Female | Adult |

Table S2 Mutations disrupt binding by antibodies with known epitope

|                | Epitope   | Antibody | Fold reduction |
|----------------|-----------|----------|----------------|
| X31-mRBS       | RBS       | C05      | 367            |
| X31-mRBS       | RBS       | HC19     | 12             |
| X31-mInterface | Interface | H2214    | 65             |
| X31-mHC45      | Head      | HC45     | 21             |
| X31-mK1747     | Mid HA    | K1747    | 145            |
| X31-Delta Stem | Stem      | F16      | >500           |
| X31-mCR8020    | Stem      | CR8020   | 63             |

Loss of affinity, expressed as an n-fold ratio, was determined using KD values from ELISA with mutant and wild type HA with the specified monoclonal antibodies, in order to verify that the mutations introduced into HA for epitope mapping disrupted binding.

Fig. S1 Influenza isolates used in this study

| Isolate                           | Abbrev.     | # Diff. | % Div. |
|-----------------------------------|-------------|---------|--------|
| A/Aichi/02/1968(H3N2)             | H3-HK-1968  | 0       | 0      |
| A/Port Chalmers/1/1973(H3N2)      | H3-PC-1973  | 20      | 4      |
| A/Victoria/3/1975(H3N2)           | H3-VI-1975  | 28      | 5      |
| A/Texas/1/1977(H3N2)              | H3-TX-1977  | 35      | 7      |
| A/Bangkok/01/1979(H3N2)           | H3-BK-1979  | 41      | 8      |
| A/Philippines/2/1982(H3N2)        | H3-PH-1982  | 46      | 9      |
| A/Shanghai/11/1987(H3N2)          | H3-SH-1987  | 53      | 10     |
| A/Beijing/353/1989(H3N2)          | H3-BJ-1989  | 55      | 11     |
| A/Johannesburg/33/1994(H3N2)      | H3-JB-1994  | 63      | 12     |
| A/Moscow/10/1099(H3N2)            | H3-MO-1999  | 60      | 12     |
| A/Wisconsin/67/2005(H3N2)         | H3-WI-2005  | 73      | 14     |
| A/California/04/2009(H1N1)        | H1-CA-2009  | 291     | 56     |
| A/dfeb/BO/PBV780-781/2011(H18N11) | H18-BO-2011 | 331     | 62     |
| B/Phuket/3073/2013                | B-PK-2013   | 400     | 74     |

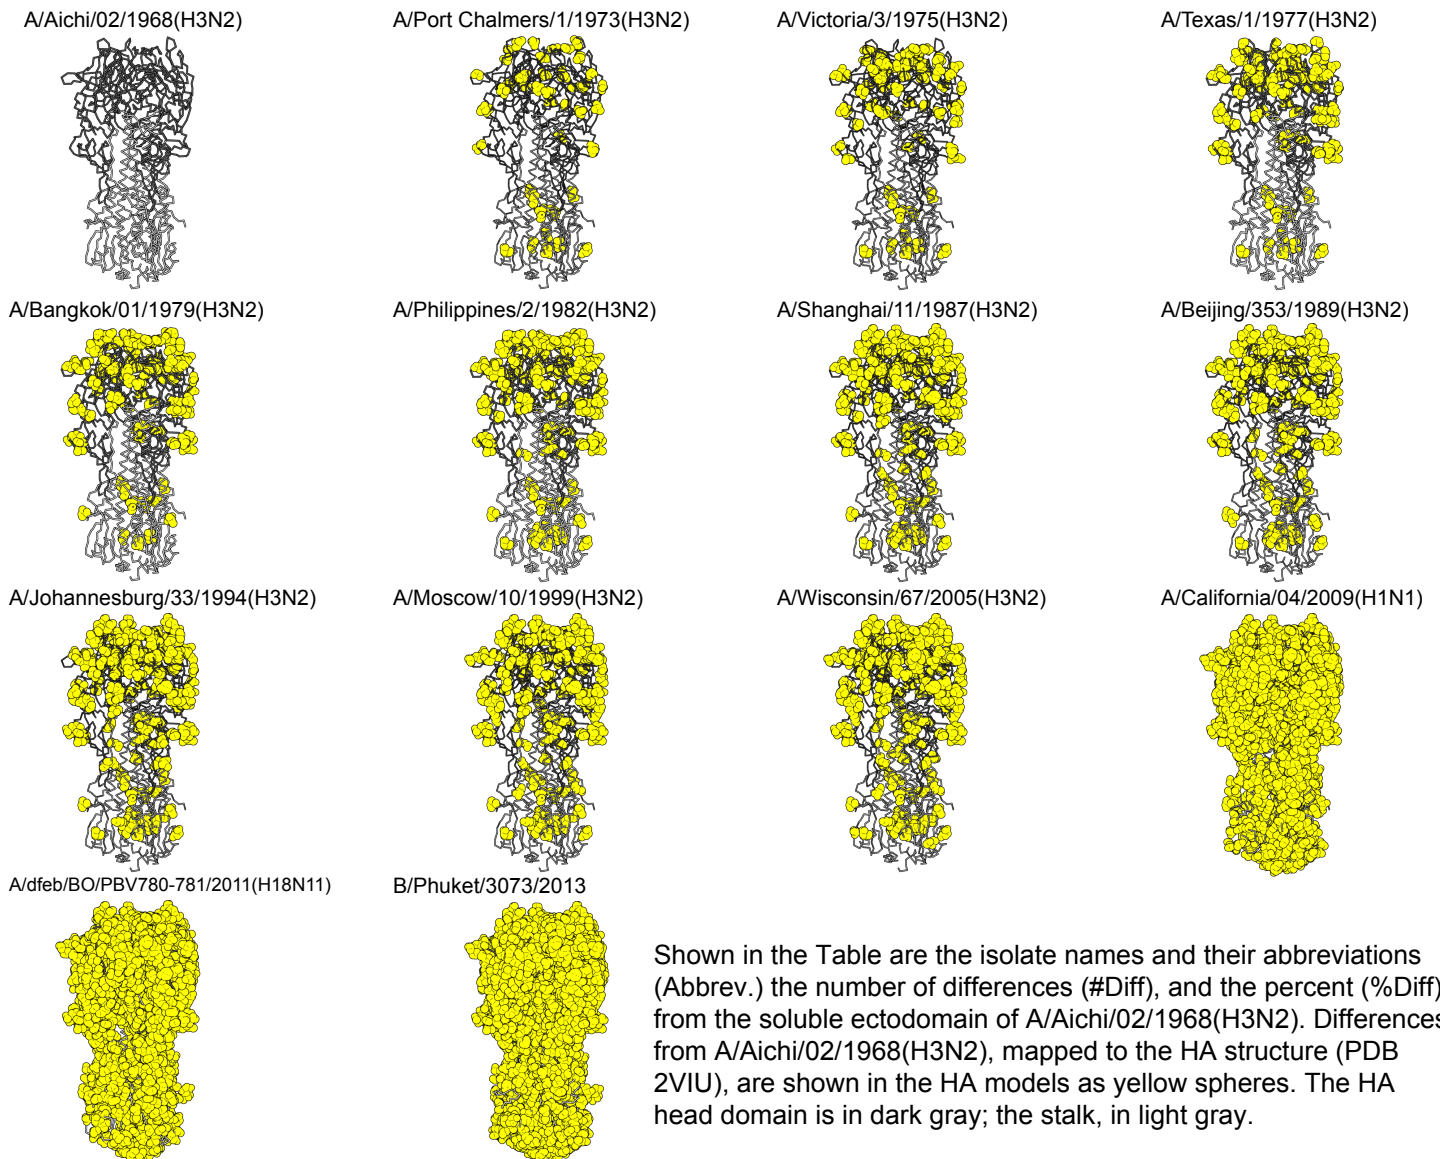

Fig. S2. Reactivities of macaque sera.

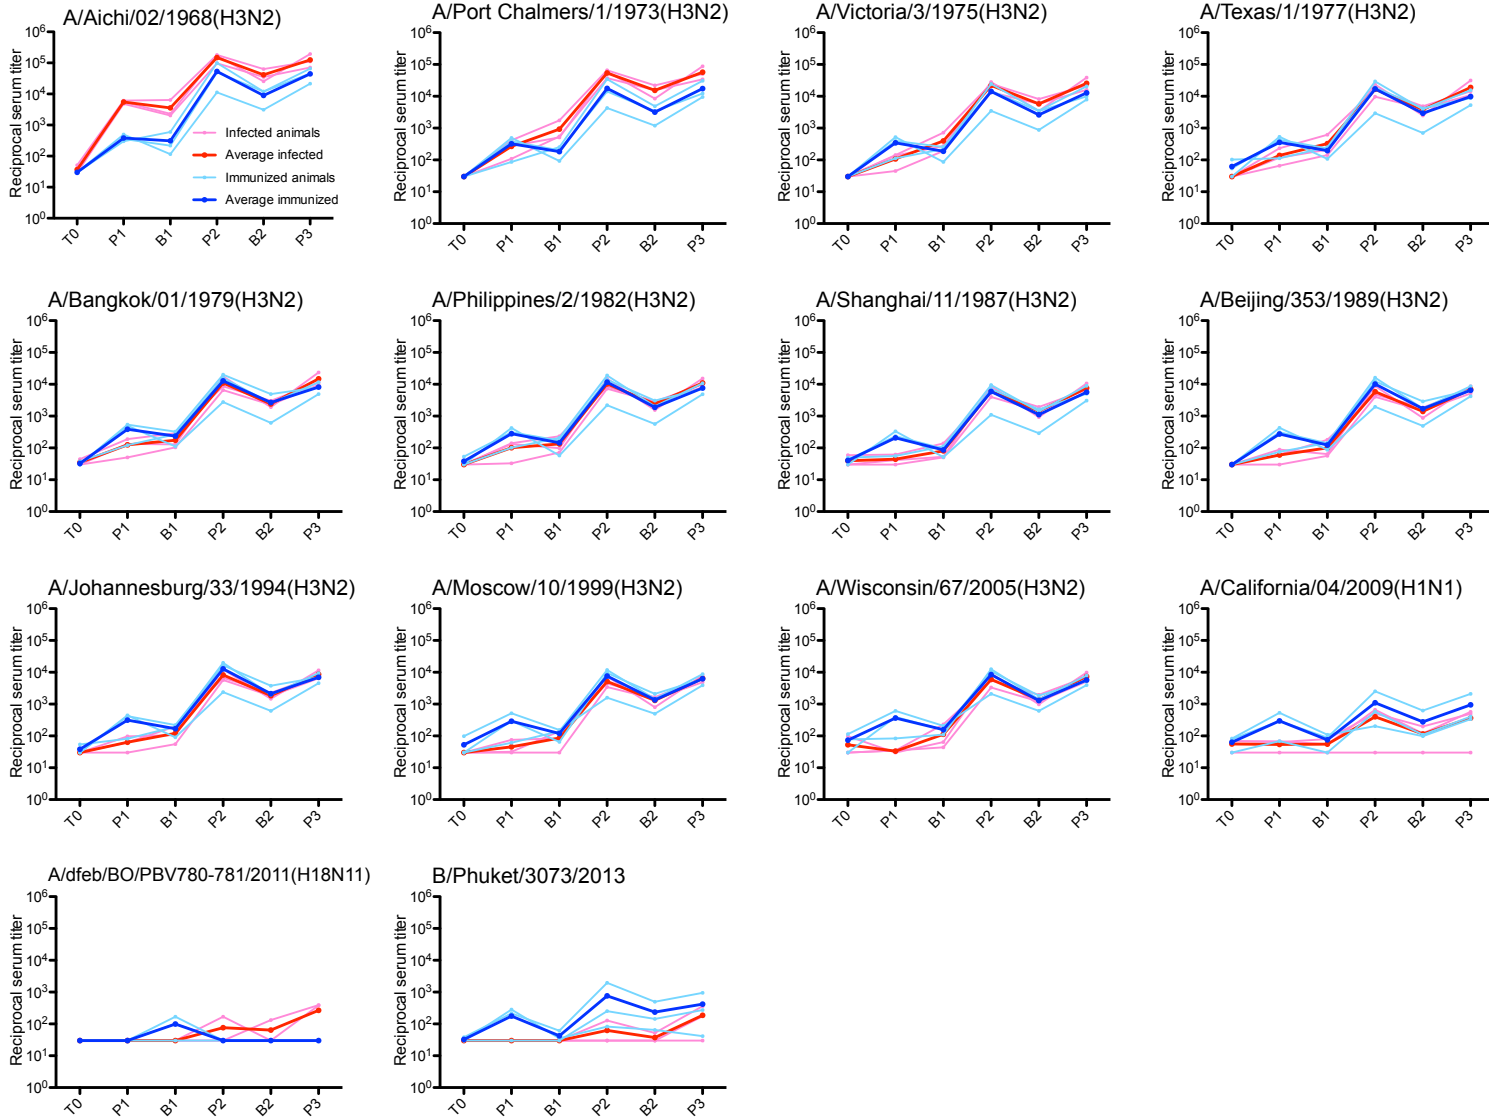

Graphs show reciprocal serum titers for the indicated HA proteins, as measured by ELISA. For each panel the time points on the x-axis correspond to Fig. 1 and are: Time 0 (T0), peak 1 (p1), baseline 1 (b1), peak 2 (p2), baseline 2 (b2), peak 3 (p3).

Fig. S3. Neutralization of influenza viruses

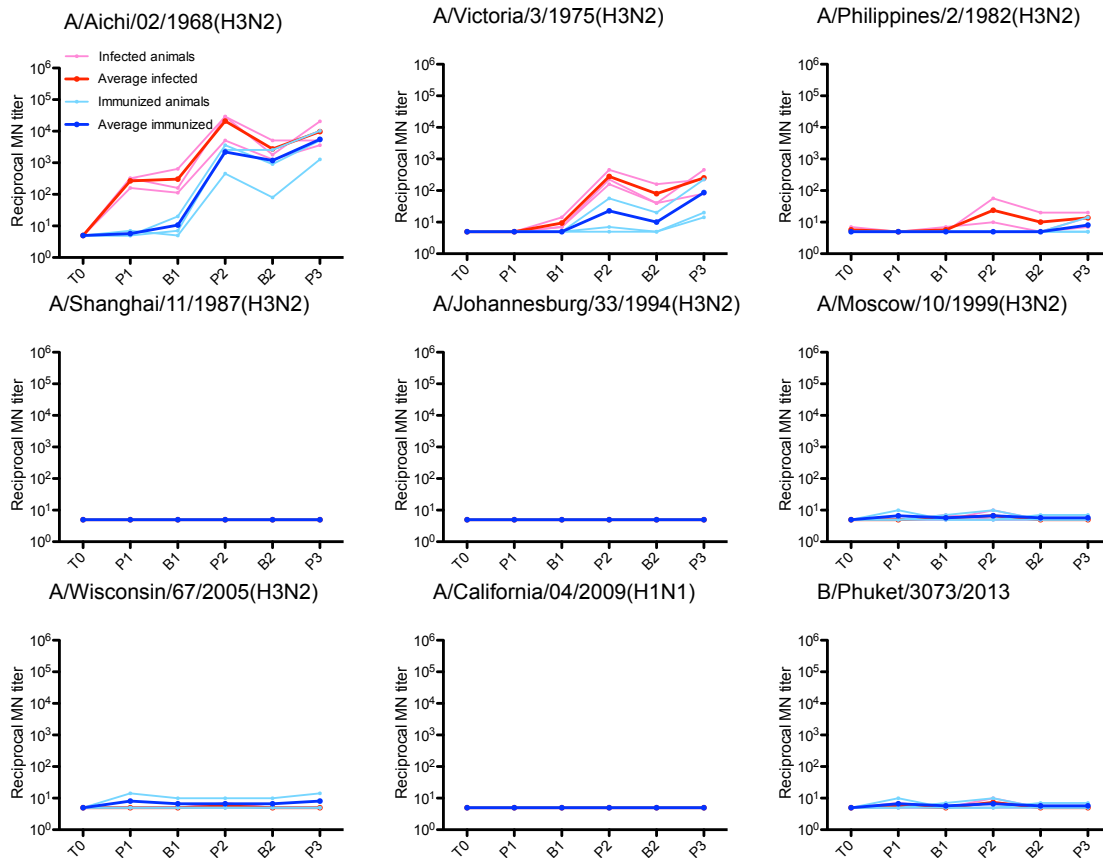

Macaque sera were tested by microneutralization assay; the reciprocal neutralizing titers are graphed. For each panel the time points on the x-axis correspond to Fig. 1 and are: Time 0 (T0), peak 1 (p1), baseline 1 (b1), peak 2 (p2), baseline 2 (b2), peak 3 (p3).

Fig. S4. Cross reactivity of macaque sera

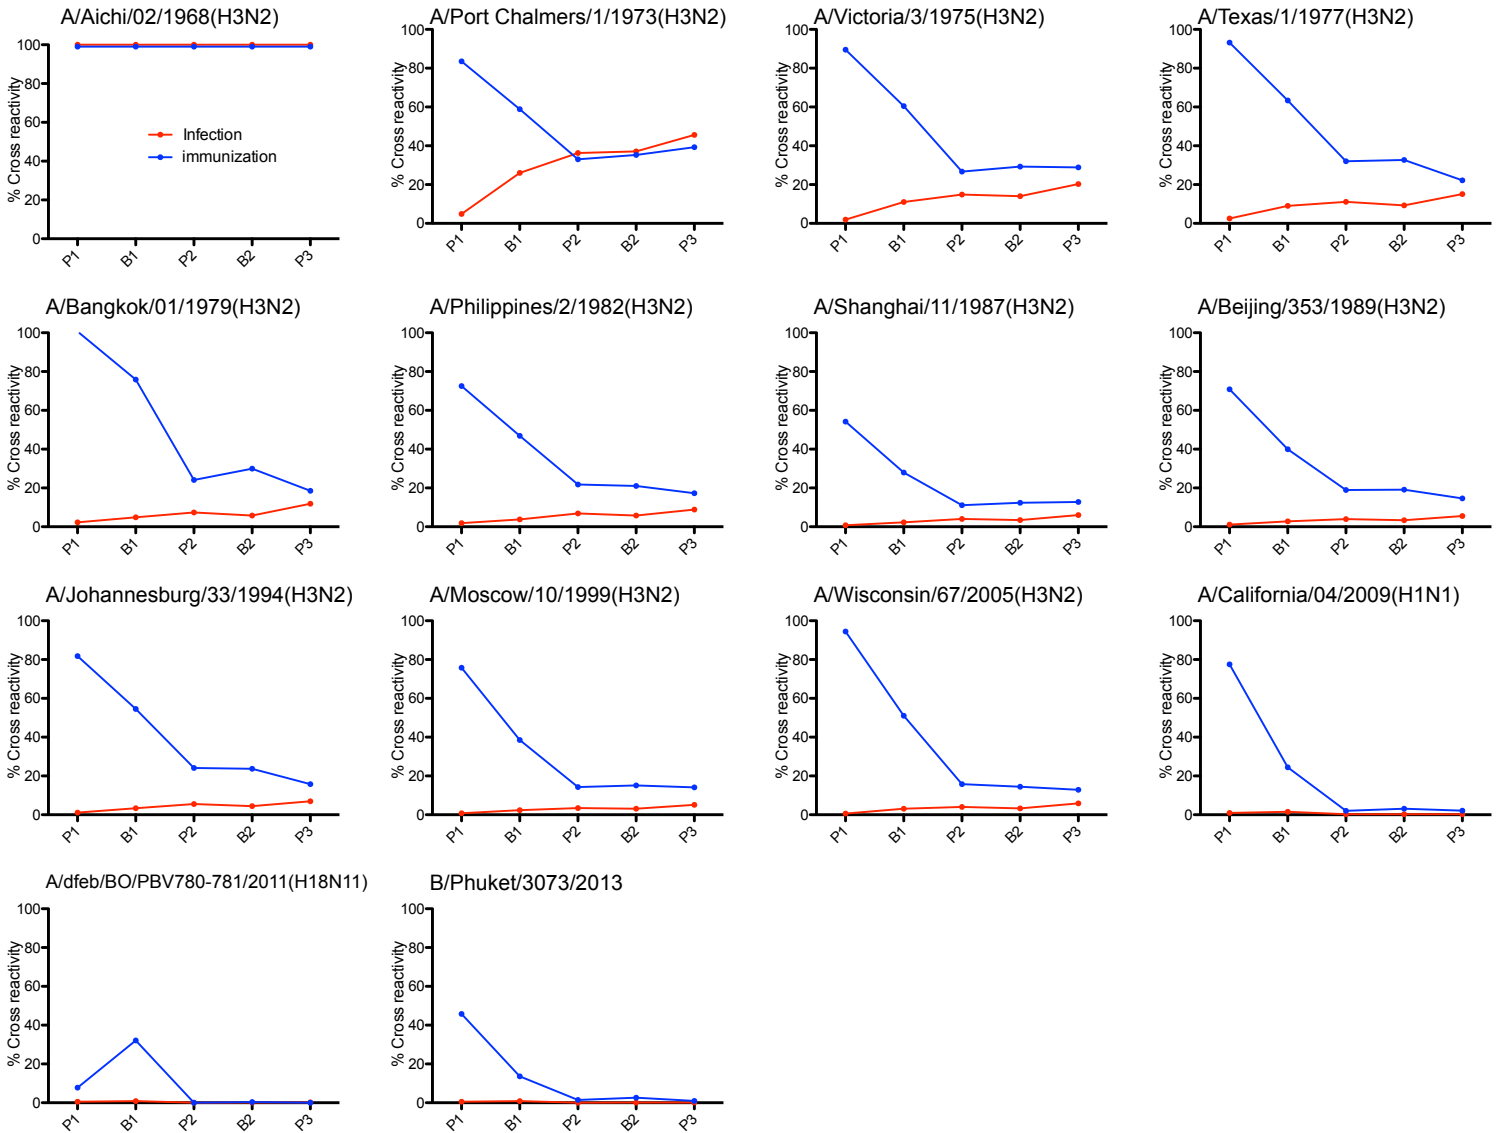

Using the averaged ELISA titers for each cohort, we calculated the percentage of the HA-directed serum response that reacts with heterologous HAs ( $(\text{Heterologous titer} \div \text{H3-HK-1968 titer}) \times 100$ ). For each panel the time points on the x-axis correspond to Fig. 1 and are: Time 0 (T0), peak 1 (p1), baseline 1 (b1), peak 2 (p2), baseline 2 (b2), peak 3 (p3).





Fig. S6. Mode of exposure influences the distribution of epitopes bound by serum antibodies.

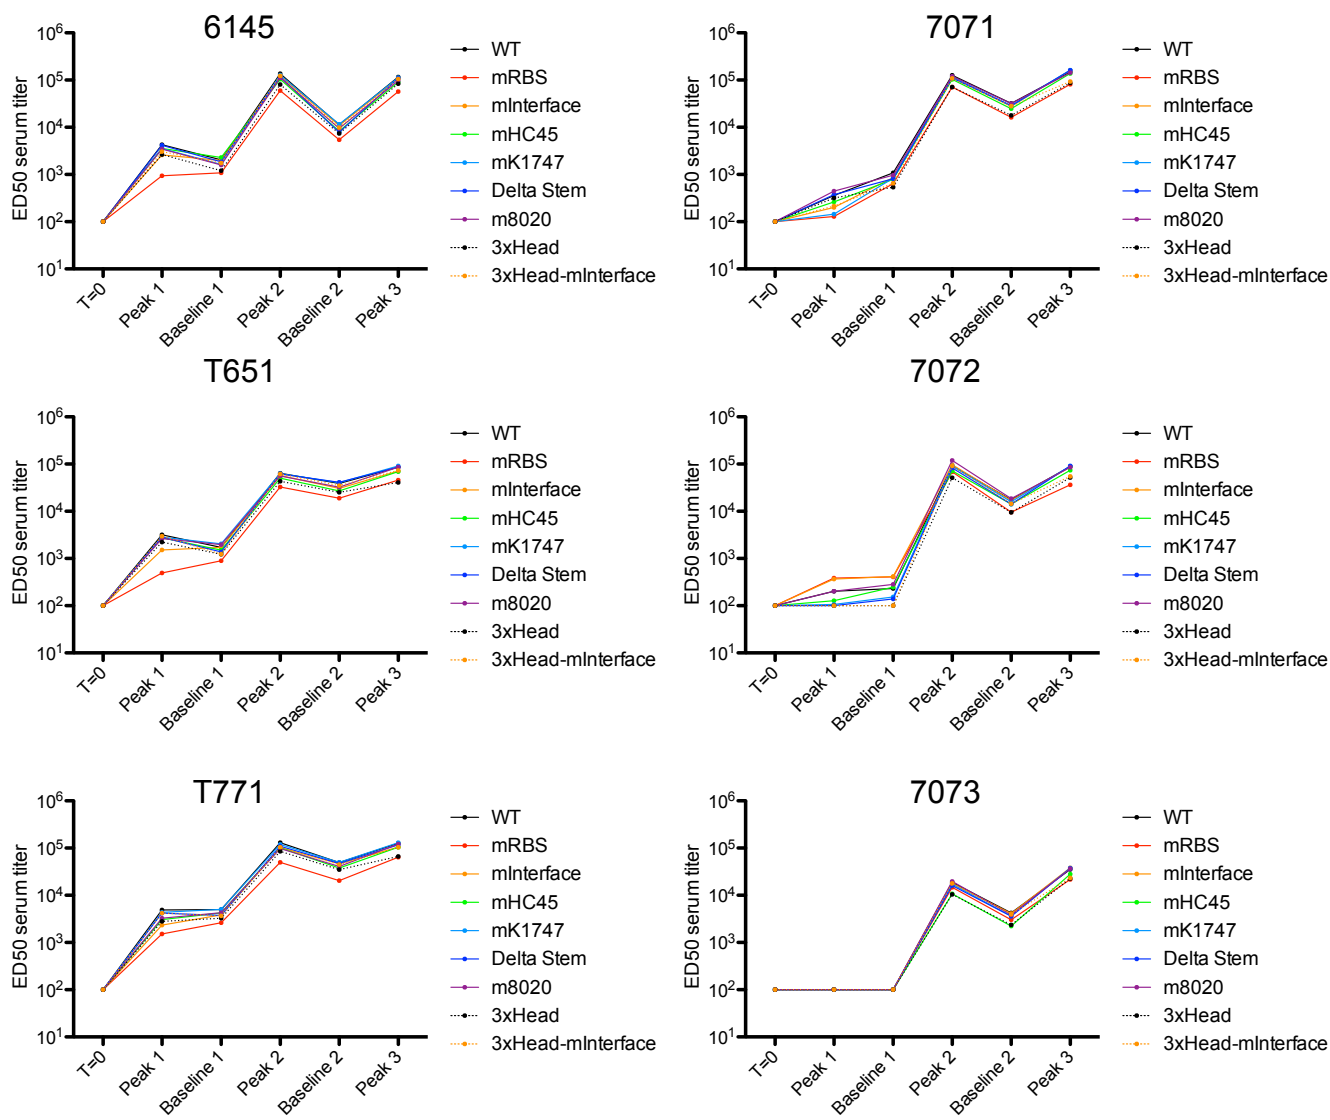

ELISA ED50 data used for Fig 3. For each panel the time points on the x-axis correspond to Fig. 1 and are: Time 0 (T0), peak 1 (p1), baseline 1 (b1), peak 2 (p2), baseline 2 (b2), peak 3 (p3).
